# Supplementary figures and images for: Footprints of Optimal Protein Assembly Strategies in the Operonic Structure of Prokaryotes
Source: MDPI journal article supplement (doi:10.3390/metabo5020252), 2015-04-28

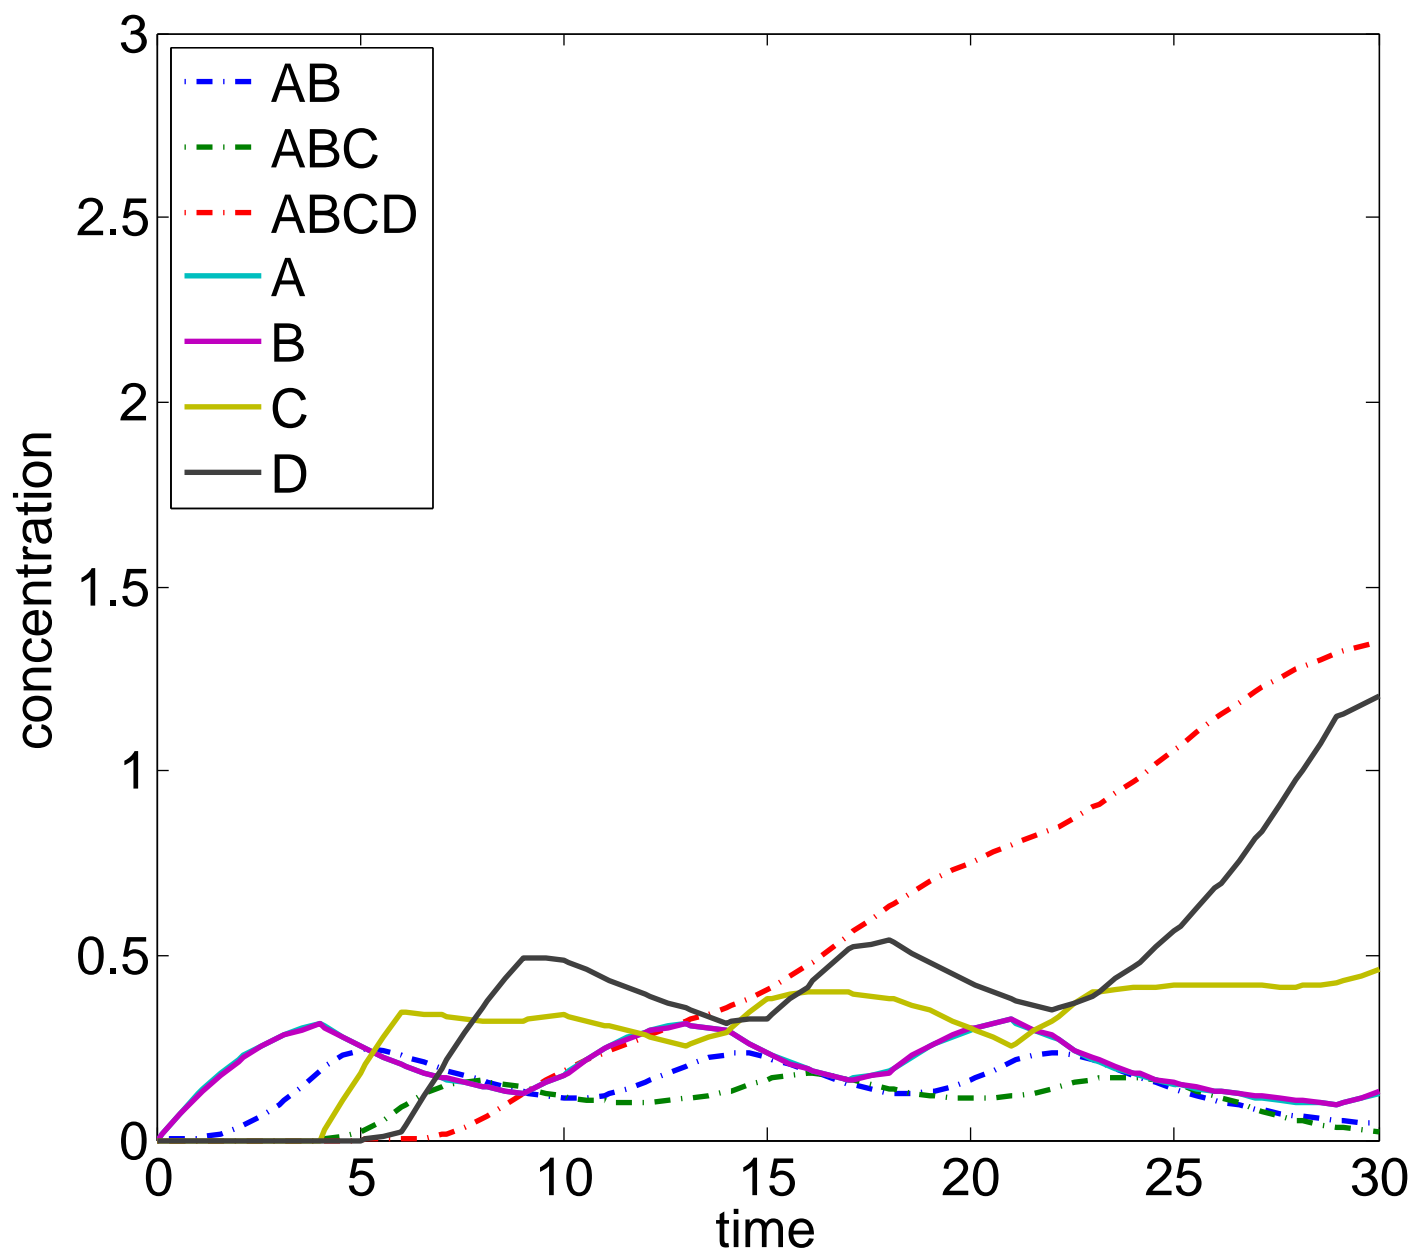

Supplement: s1 [file s1]

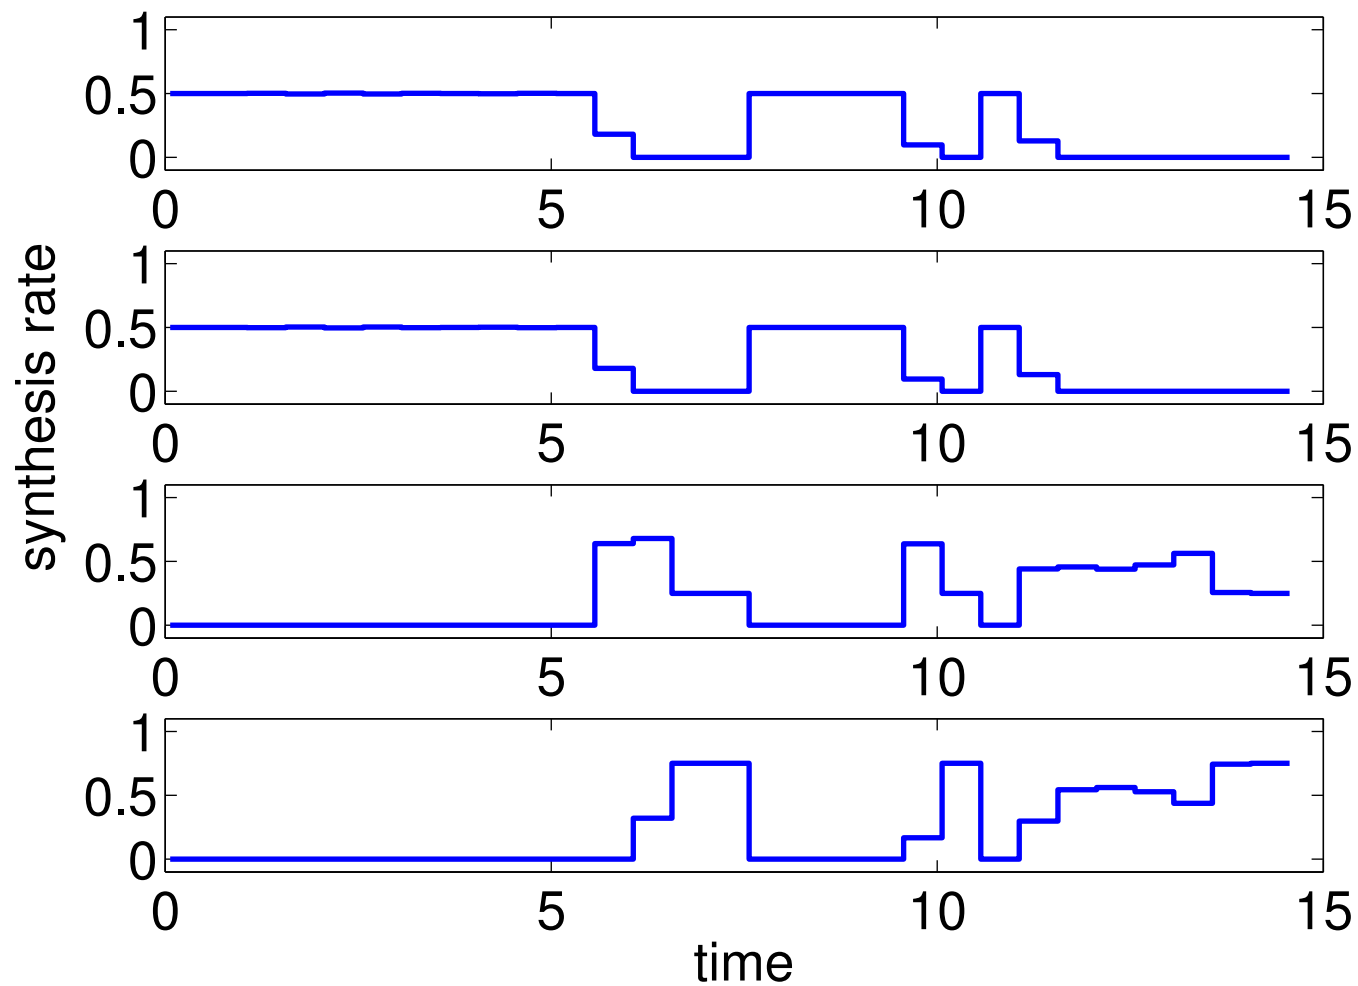

Supplement: s1 [file s1]

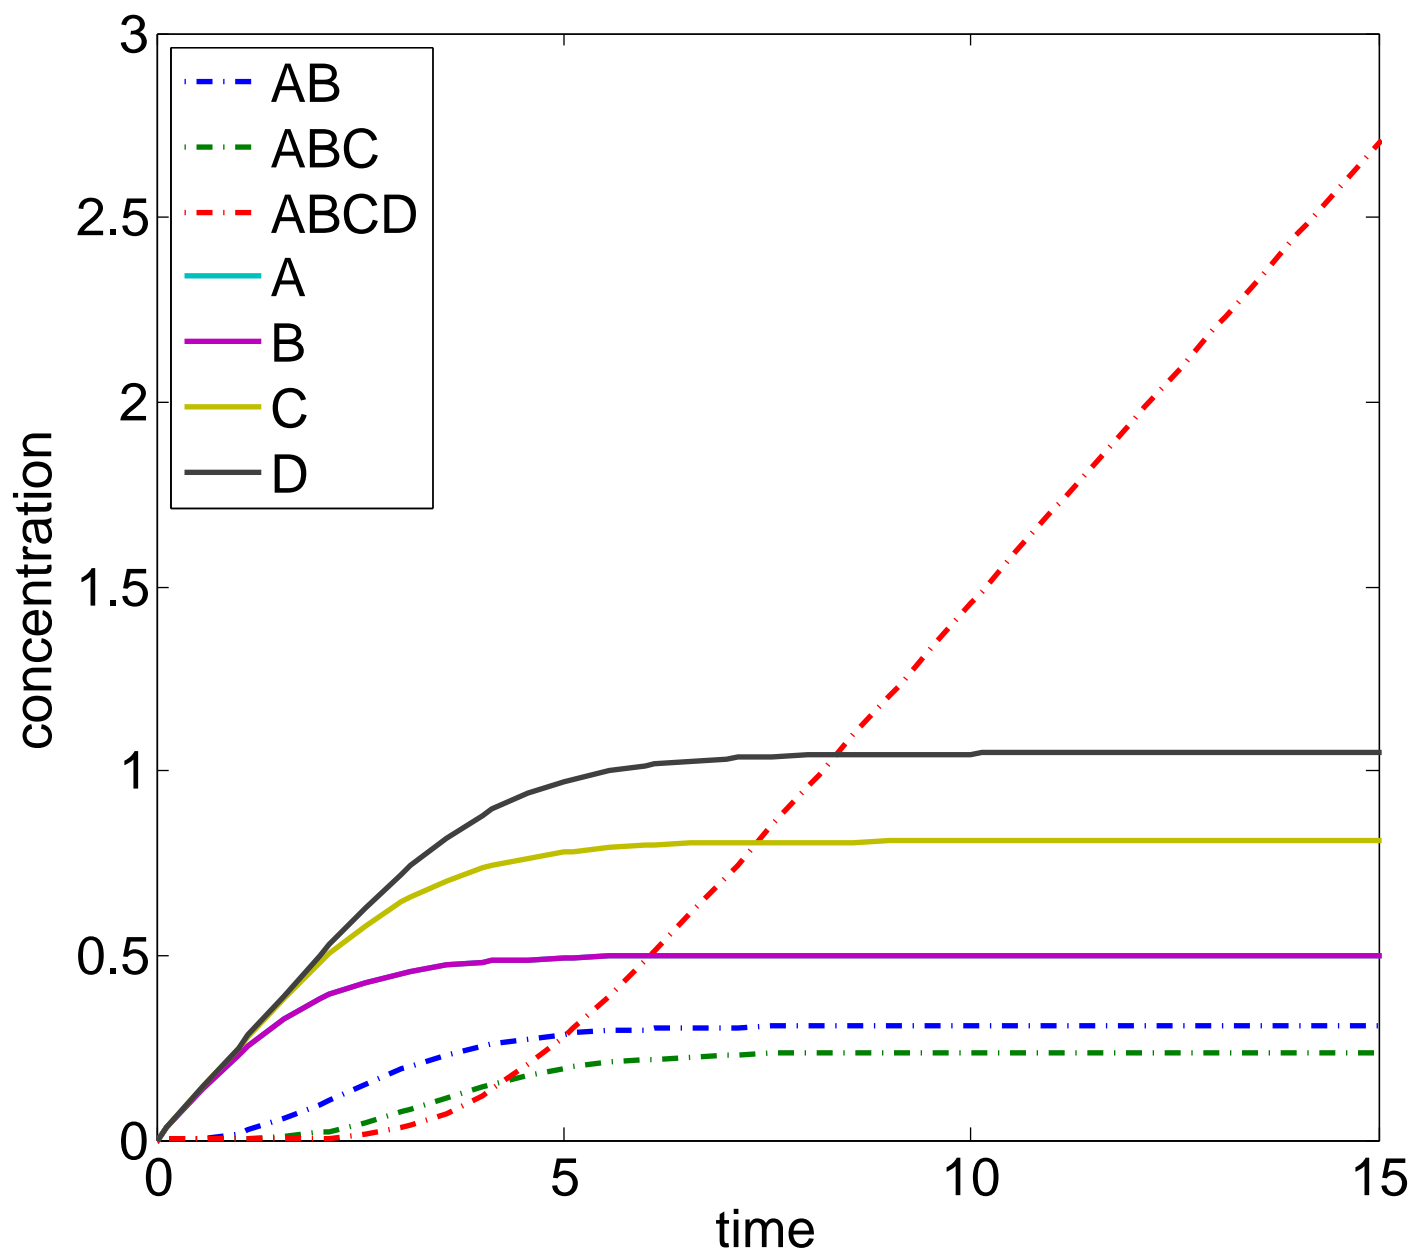

Supplement: s1 [file s1]

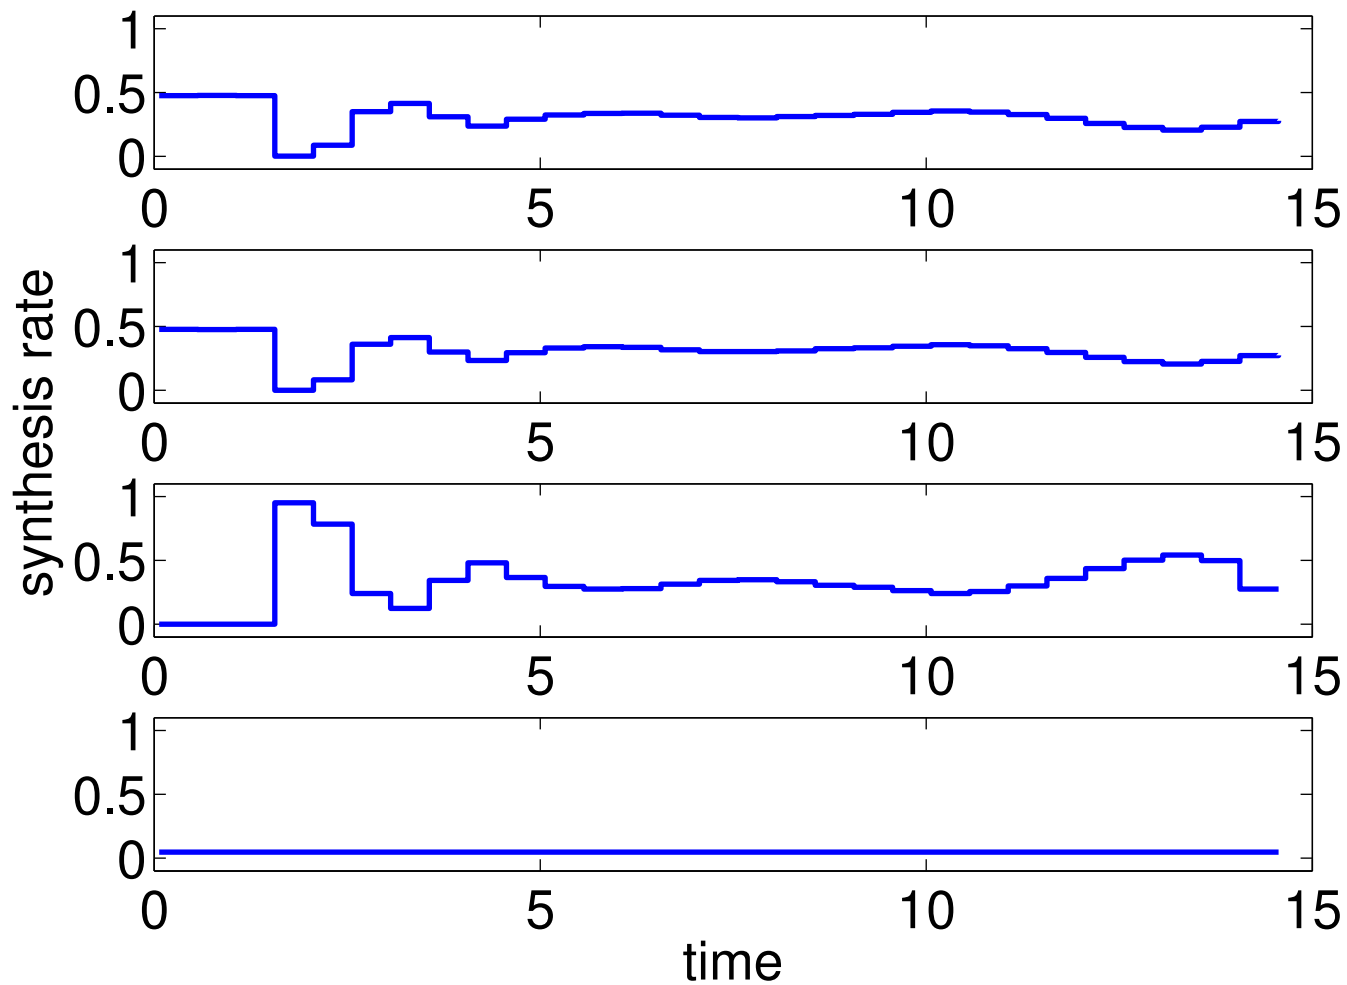

Supplement: s1 [file s1]

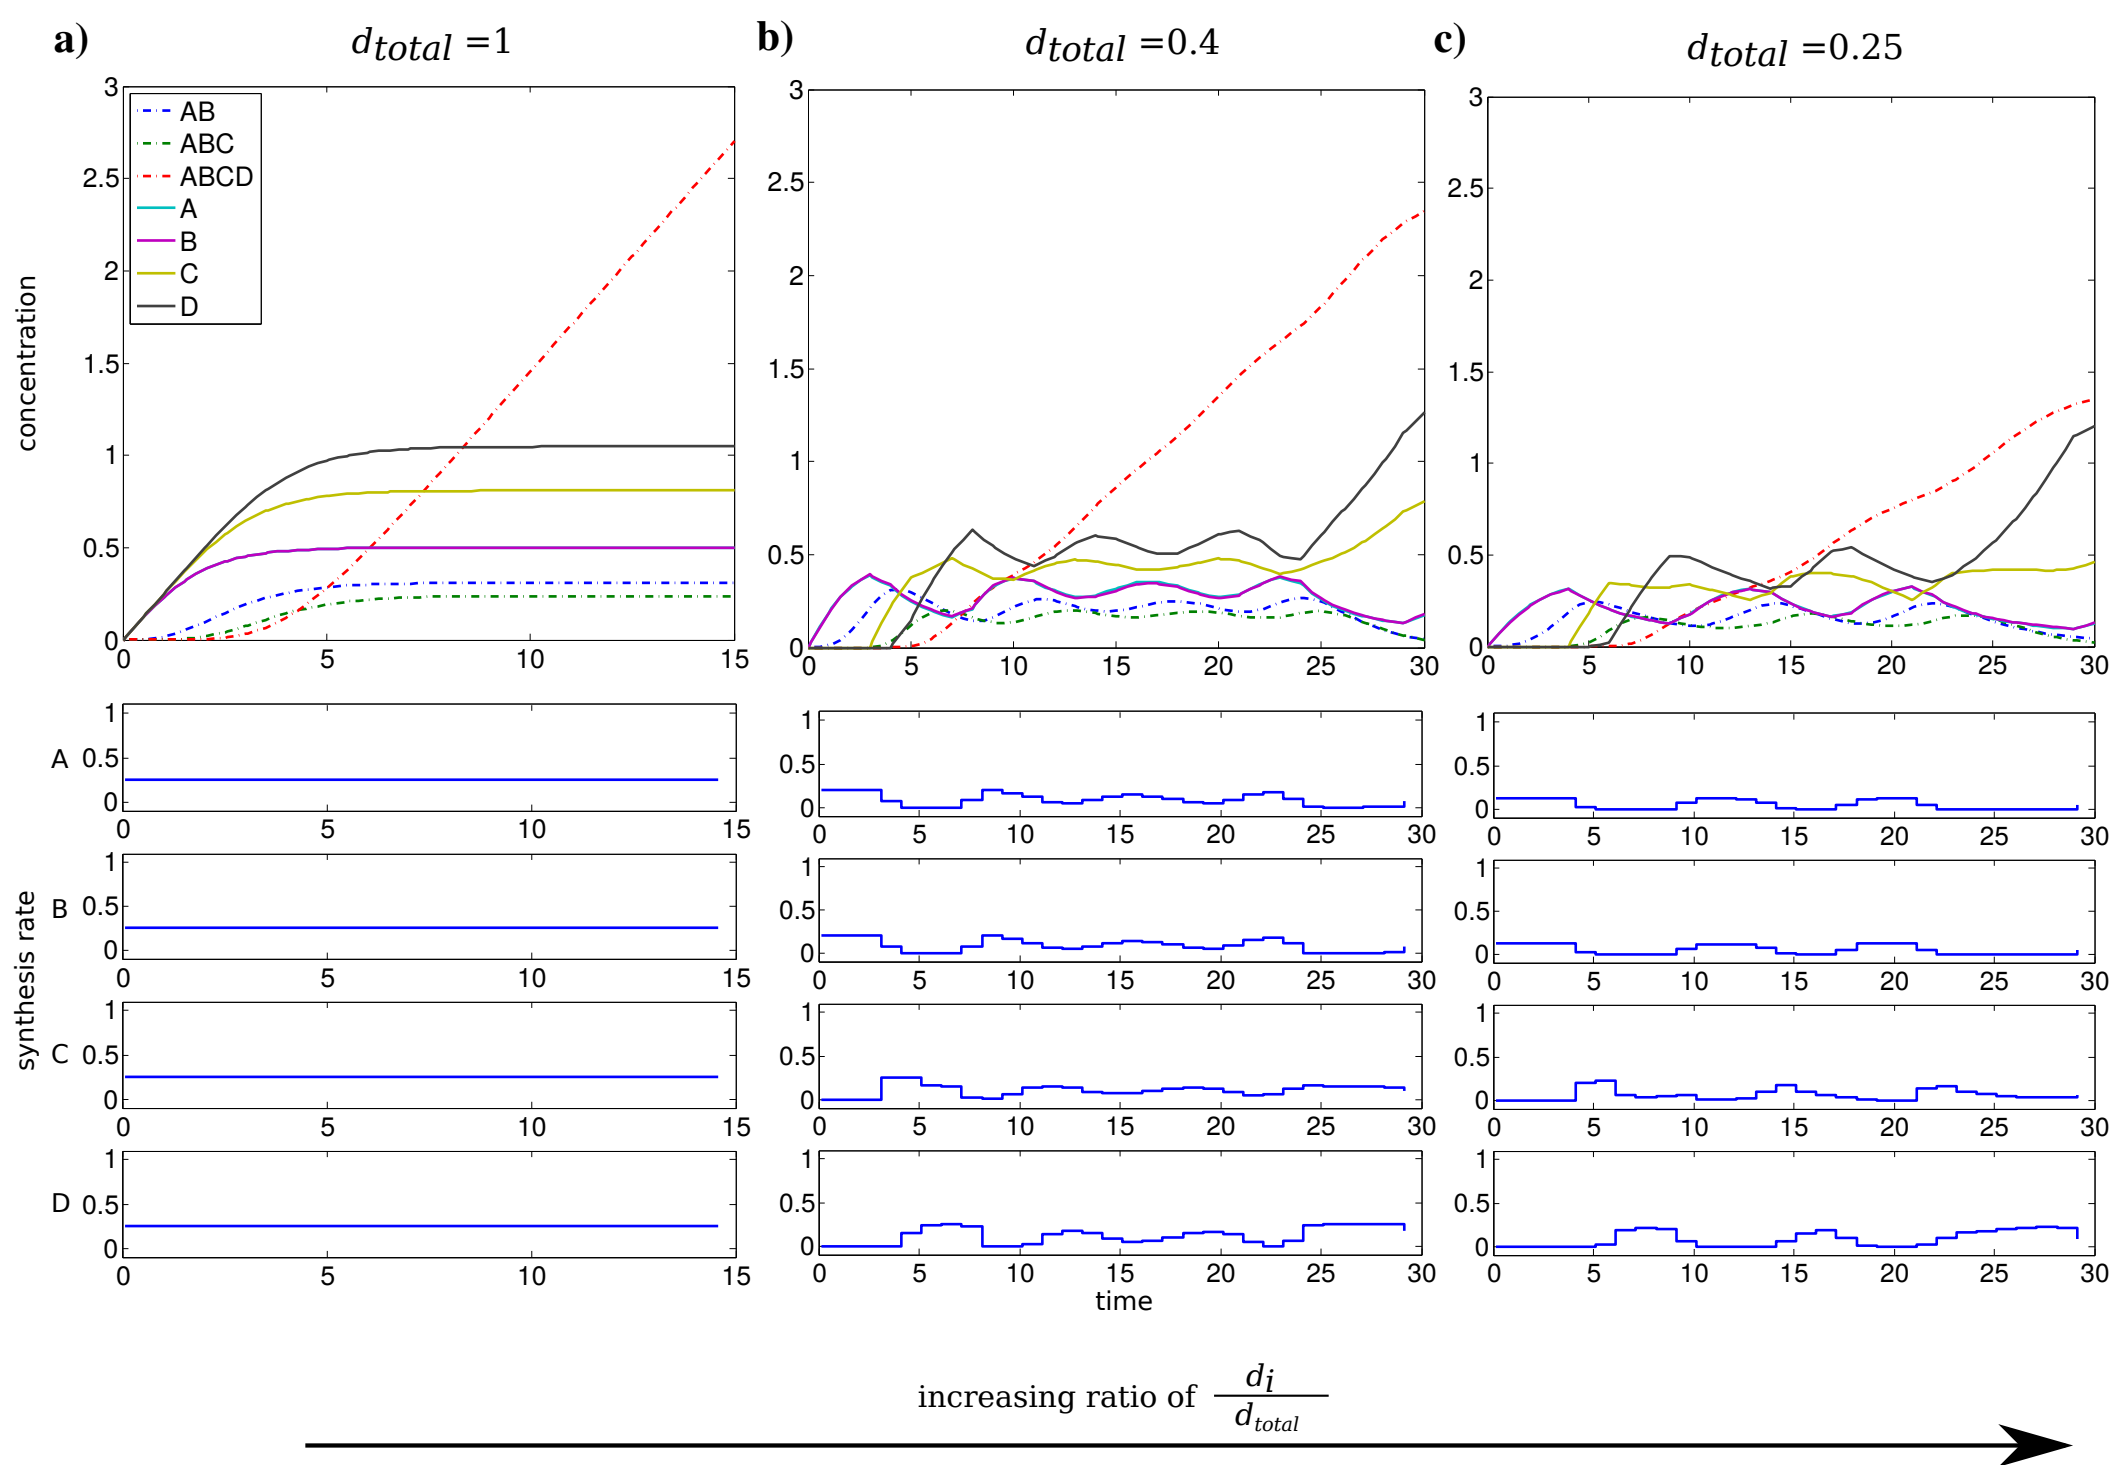

Supplement: s1 [file s1]

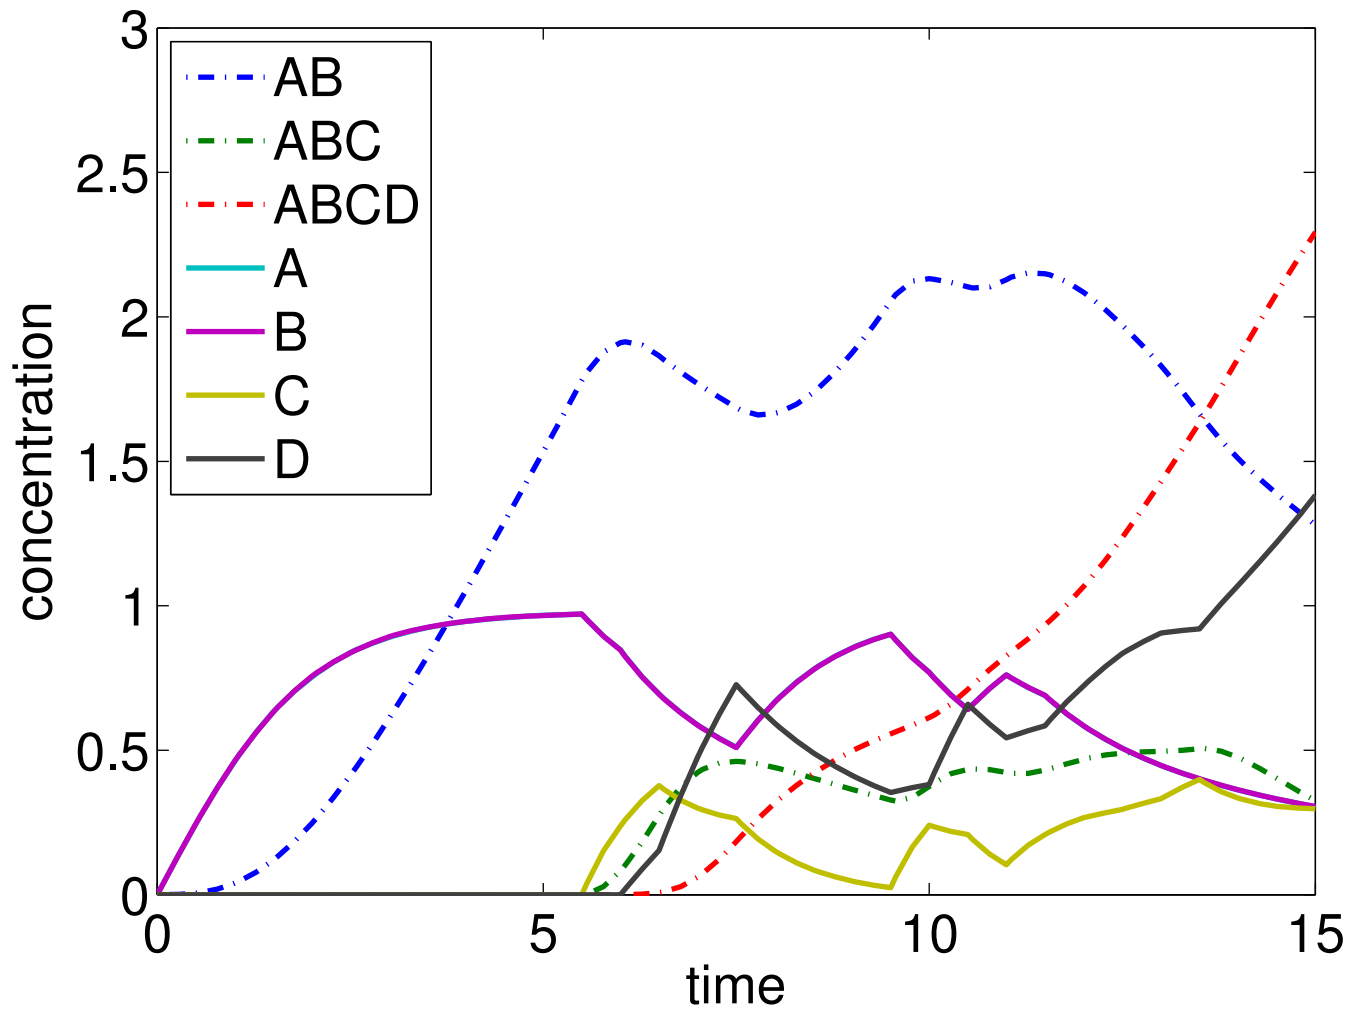

Supplement: s1 [file s1]

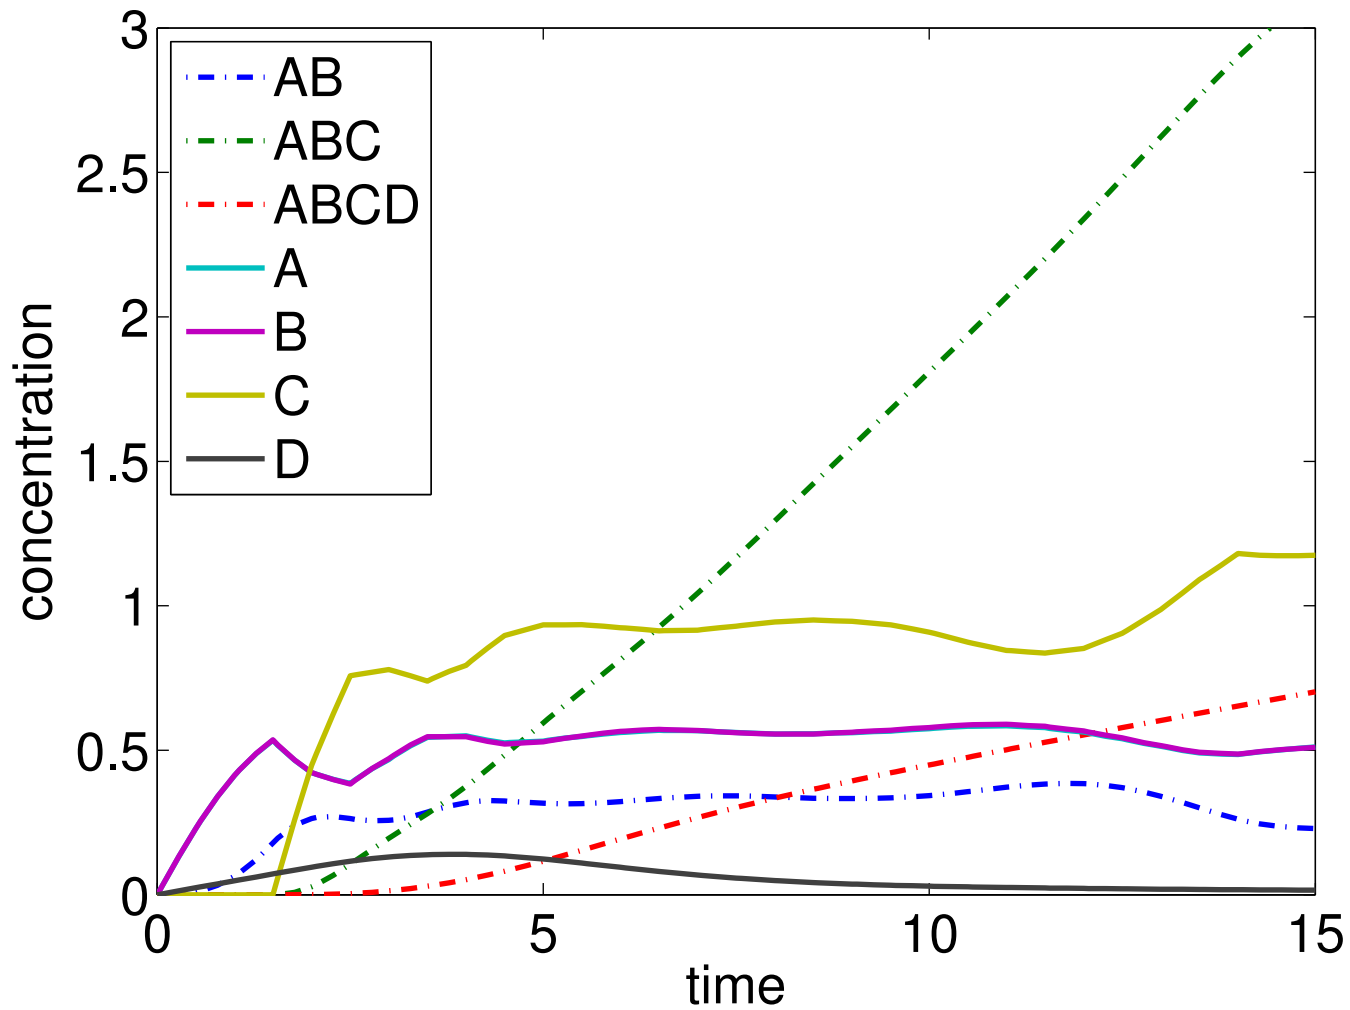

Supplement: s1 [file s1]

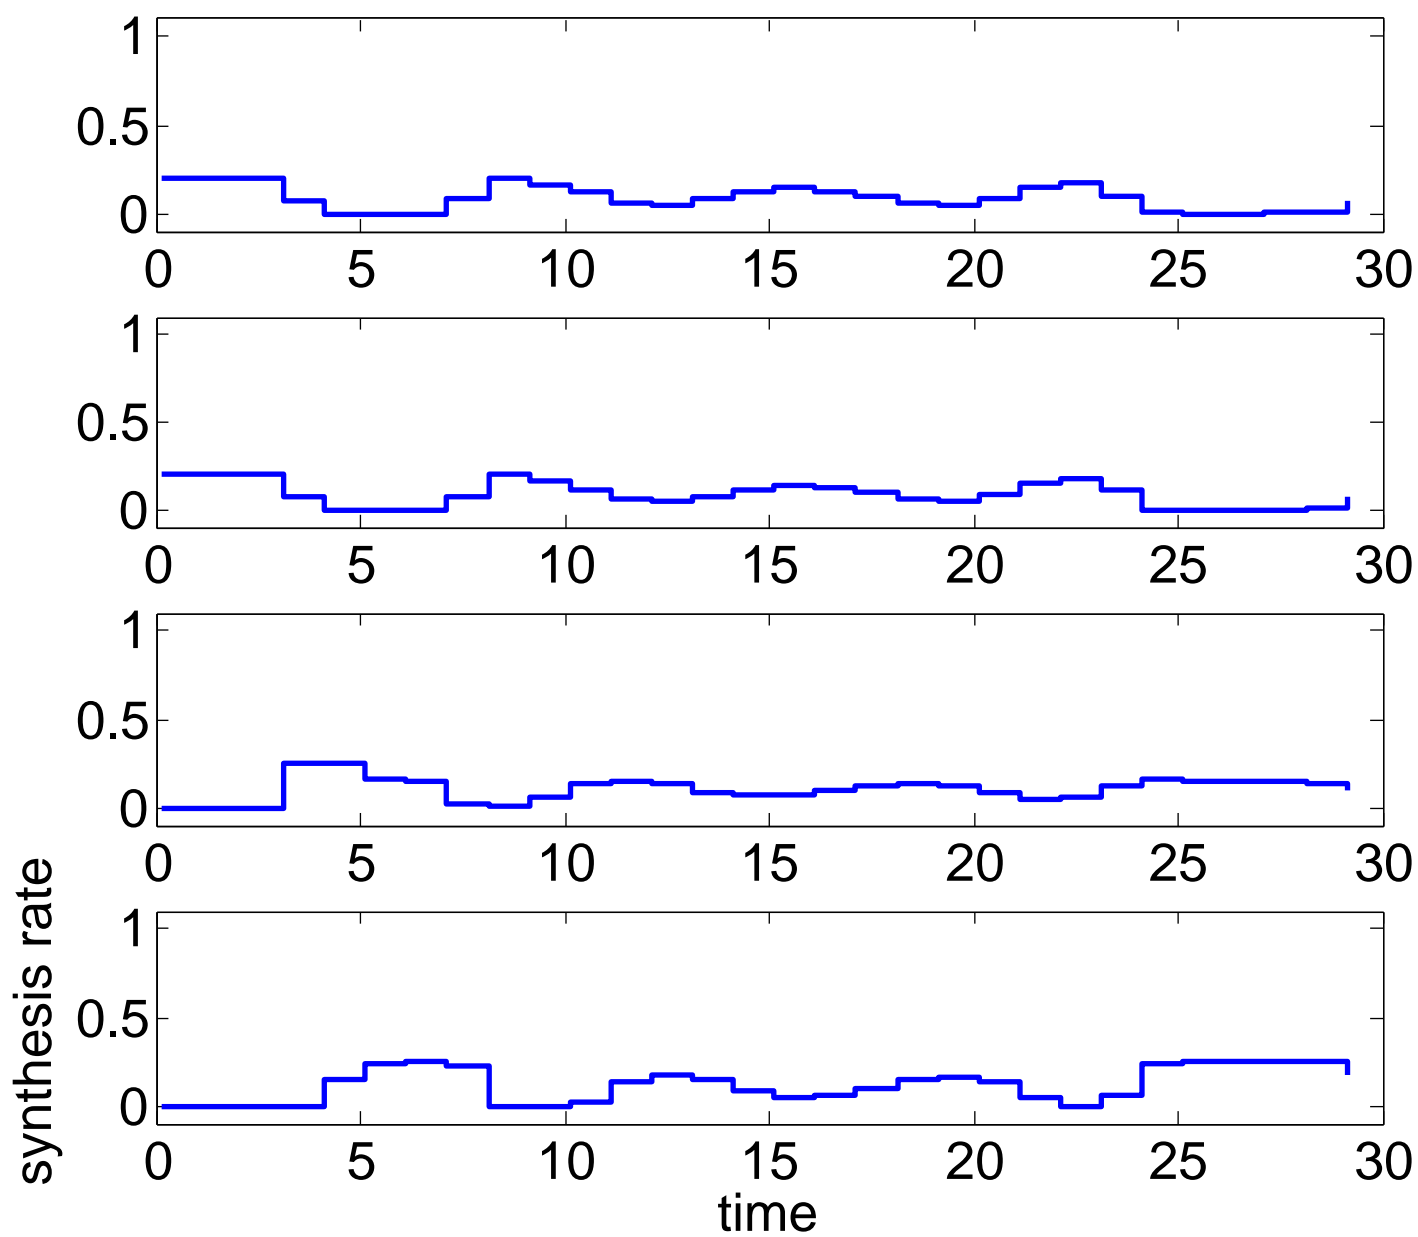

Supplement: s1 [file s1]

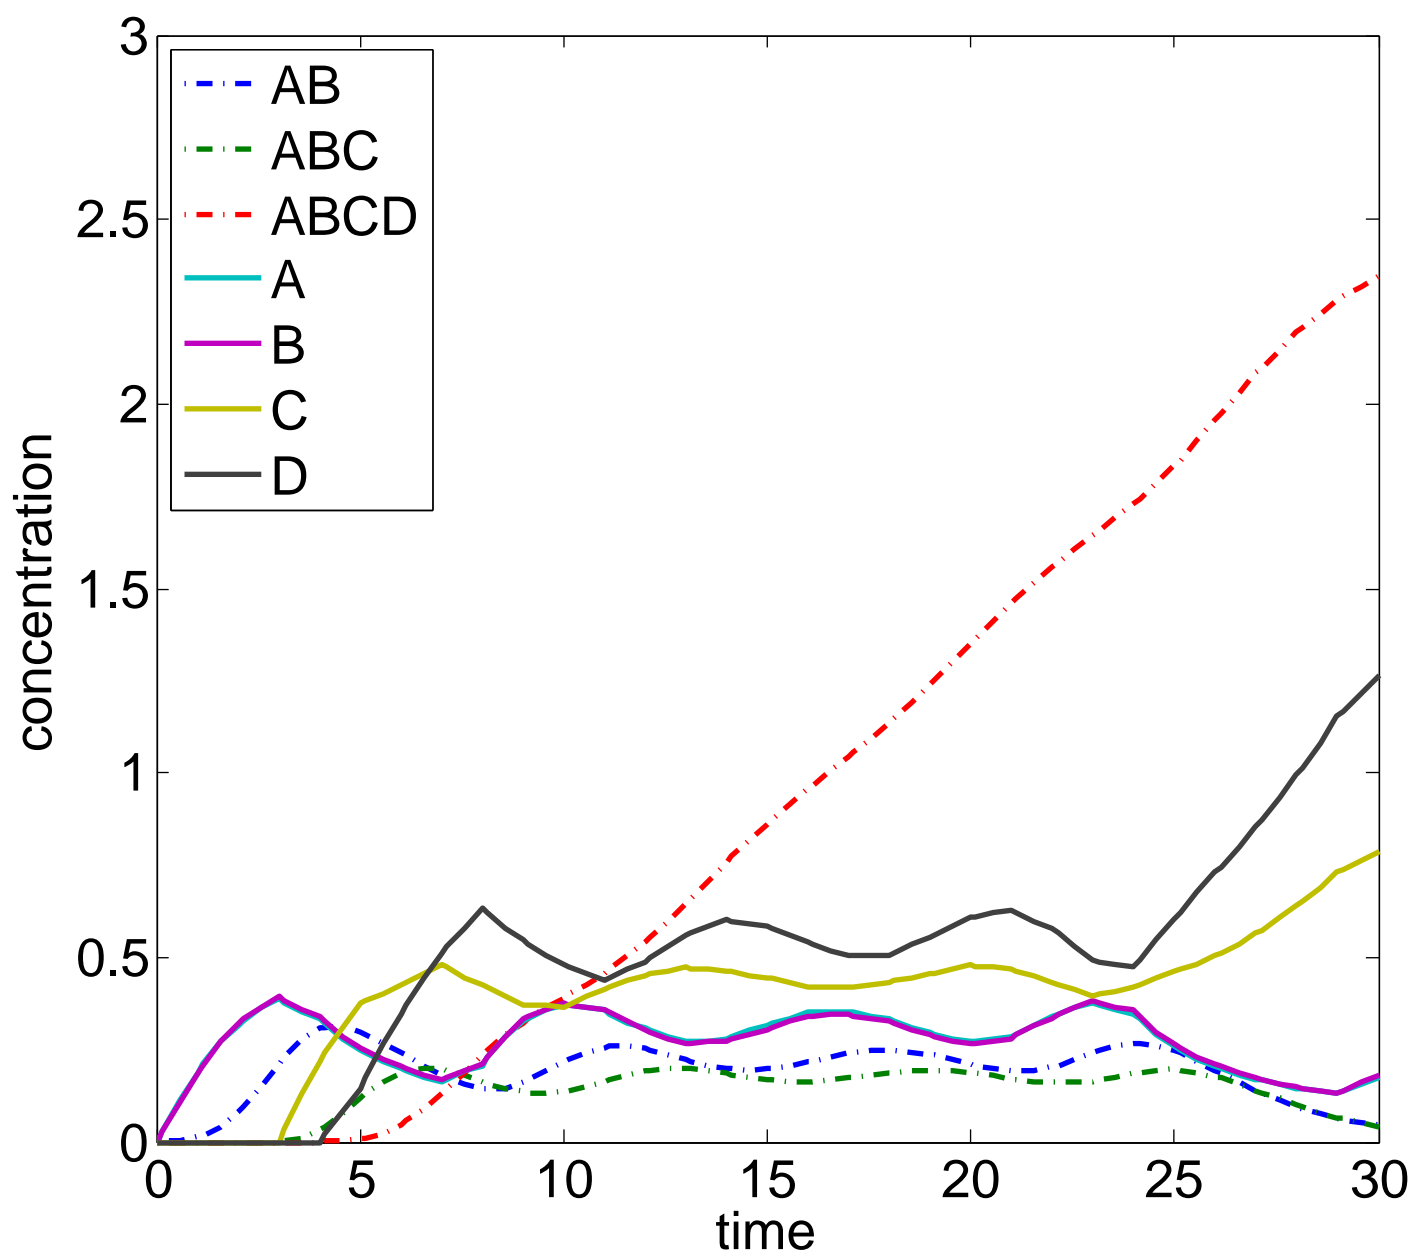

Supplement: s1 [file s1]

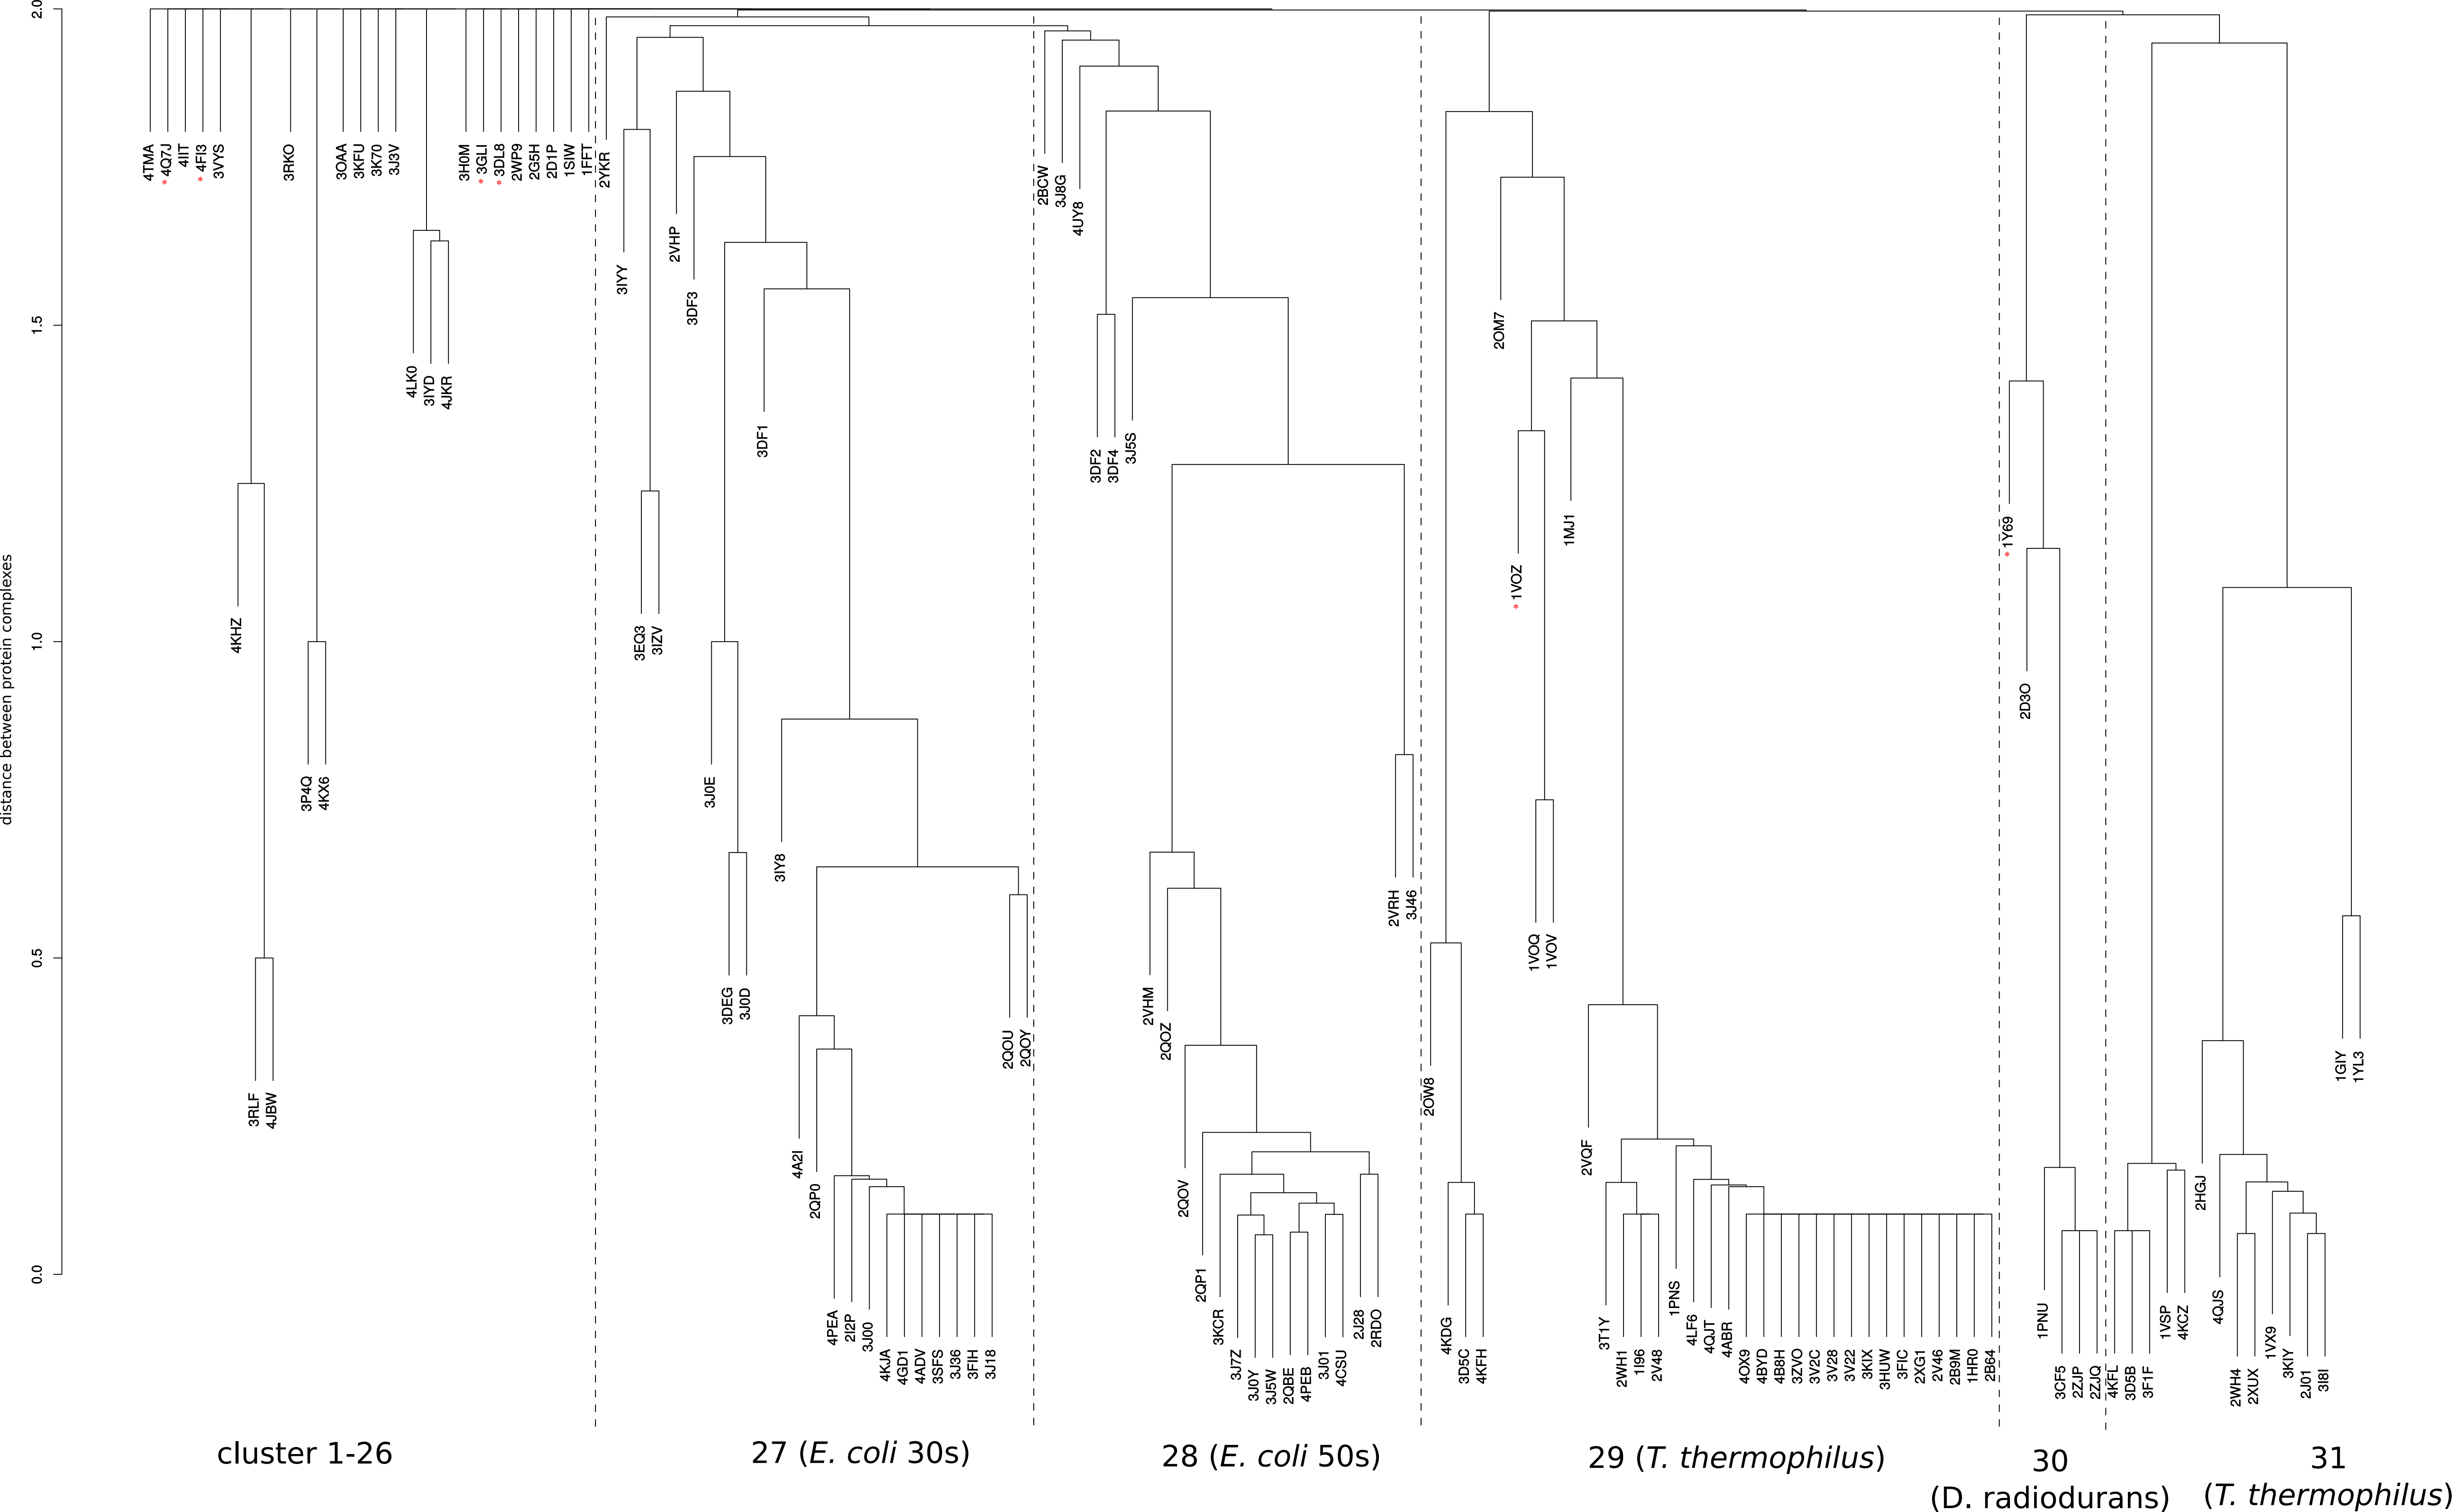

Supplement: s1 [file s1]

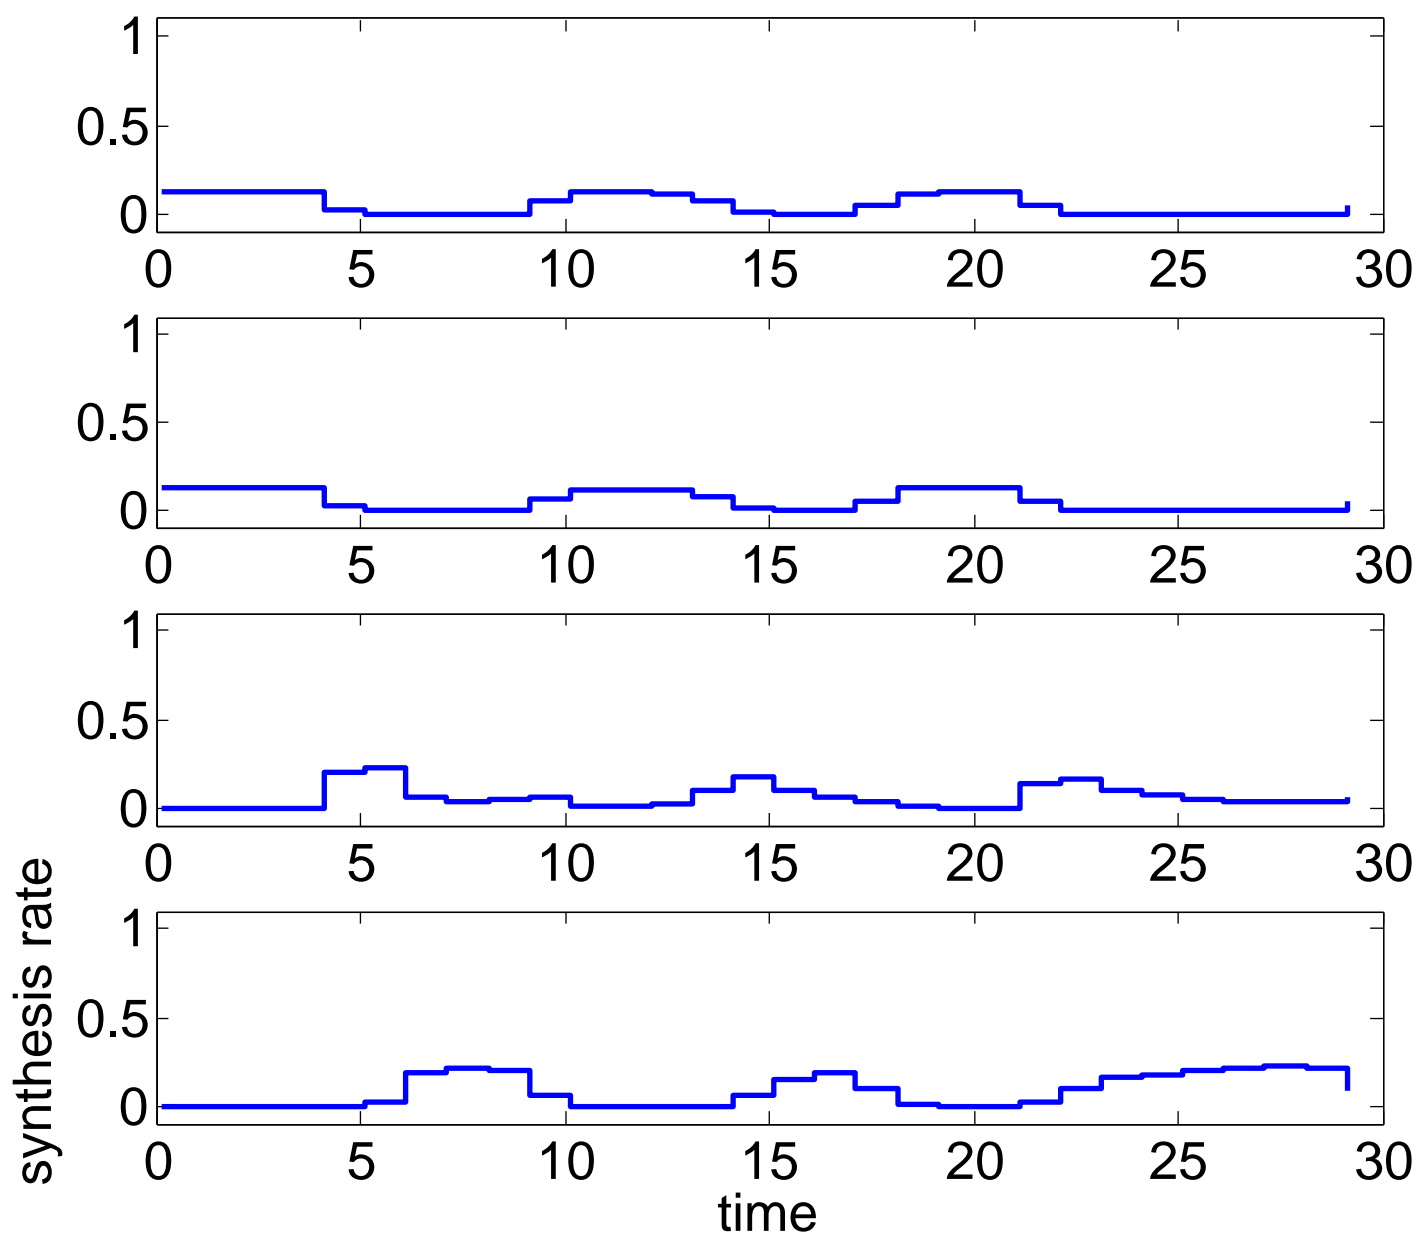

Supplement: s1 [file s1]

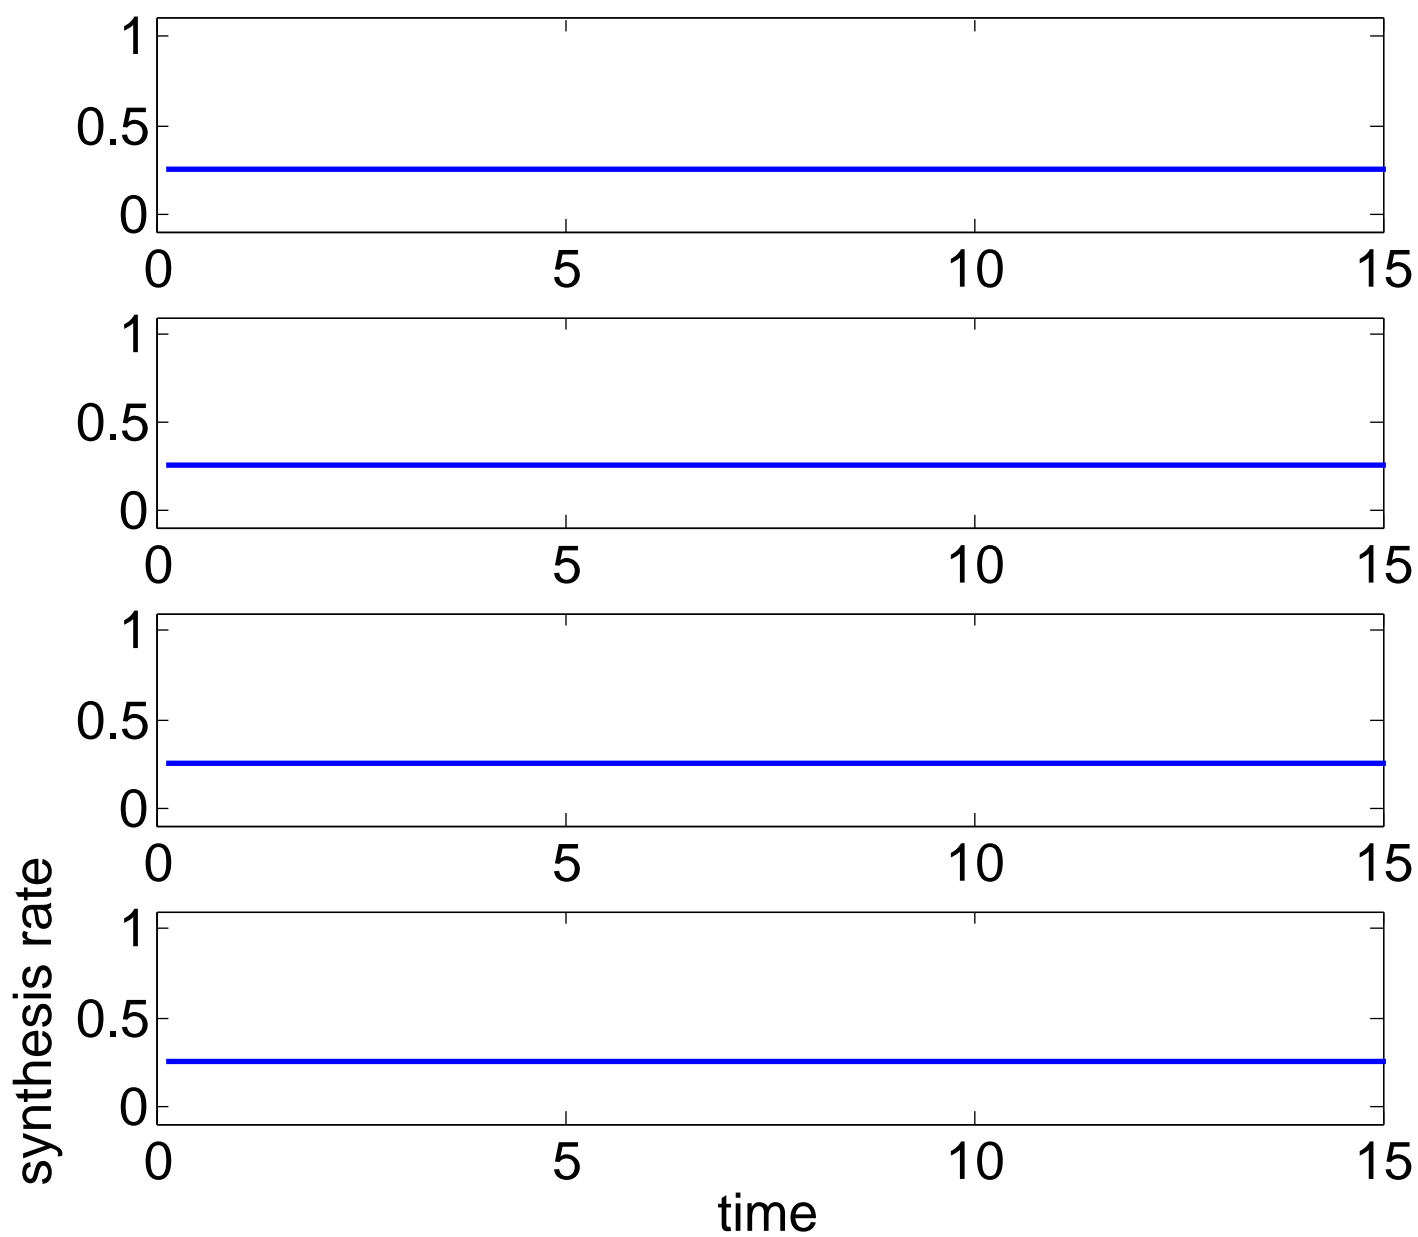

Supplement: s1 [file s1]
